# Supplementary material
Source: PubMed Central journal article supplement (PMC9452488)
Supplement: NIHMS1822580-supplement-1.pdf [file NIHMS1822580-supplement-1.pdf]

**Supplemental Table 1. Models Examining if Pre-Meal NA Predicts Subsequent LOC-Eating**

| Composite negative affect  | $\beta$ | SE    | p     | 95% CI         |
|----------------------------|---------|-------|-------|----------------|
| Intercept                  | 0.195   | 0.021 | <.001 | 0.154 - 0.237  |
| Between subject affect     | 0.550   | 0.070 | <.001 | 0.412 - 0.687  |
| Within subject affect      | 0.058   | 0.049 | .241  | -0.039 - 0.155 |
| Anger                      | $\beta$ | SE    | p     | 95% CI         |
| Intercept                  | 0.184   | 0.024 | <.001 | 0.136 - 0.231  |
| Between subject anger      | 0.327   | 0.067 | <.001 | 0.195 - 0.459  |
| Within subject anger       | 0.047   | 0.030 | .127  | -0.013 - 0.106 |
| Anxiety                    | $\beta$ | SE    | p     | 95% CI         |
| Intercept                  | 0.208   | 0.019 | <.001 | 0.17 - 0.245   |
| Between subject anxiety    | 0.495   | 0.048 | <.001 | 0.400 - 0.590  |
| Within subject anxiety     | 0.031   | 0.034 | .366  | -0.036 - 0.097 |
| Depression                 | $\beta$ | SE    | p     | 95% CI         |
| Intercept                  | 0.186   | 0.024 | <.001 | 0.138 - 0.233  |
| Between subject depression | 0.429   | 0.088 | <.001 | 0.257 - 0.601  |
| Within subject depression  | 0.007   | 0.036 | .842  | -0.063 - 0.077 |
| Guilt                      | $\beta$ | SE    | p     | 95% CI         |
| Intercept                  | 0.203   | 0.020 | <.001 | 0.165 - 0.242  |
| Between subject guilt      | 0.654   | 0.069 | <.001 | 0.52 - 0.789   |
| Within subject guilt       | 0.048   | 0.072 | .506  | -0.093 - 0.188 |

Note: LOC, loss-of-control eating; NA, negative affect

**Supplemental Table 2. Models Examining if LOC-Eating Severity Predicts Post-Meal NA**

| Composite negative affect | $\beta$ | SE    | p     | 95% CI          |
|---------------------------|---------|-------|-------|-----------------|
| Intercept                 | -0.171  | 0.017 | <.001 | -0.204 - -0.137 |
| Pre-meal negative affect  | 0.239   | 0.013 | <.001 | 0.213 - 0.265   |
| Between subject LOC       | 0.190   | 0.015 | <.001 | 0.160 - 0.220   |
| Within subject LOC        | 0.028   | 0.014 | .047  | <0.001 - 0.056  |
| Anger                     | $\beta$ | SE    | p     | 95% CI          |
| Intercept                 | -0.224  | 0.016 | <.001 | -0.257 - -0.192 |
| Pre-meal anger            | 0.289   | 0.012 | <.001 | 0.265 - 0.312   |
| Between subject LOC       | 0.099   | 0.015 | <.001 | 0.069 - 0.129   |
| Within subject LOC        | 0.015   | 0.017 | .397  | -0.019 - 0.049  |
| Anxiety                   | $\beta$ | SE    | p     | 95% CI          |
| Intercept                 | -0.138  | 0.015 | <.001 | -0.167 - -0.108 |
| Pre-meal anxiety          | 0.215   | 0.011 | <.001 | 0.194 - 0.235   |
| Between subject LOC       | 0.247   | 0.019 | <.001 | 0.209 - 0.285   |
| Within subject LOC        | 0.006   | 0.011 | .590  | -0.015 - 0.027  |
| Depression                | $\beta$ | SE    | p     | 95% CI          |
| Intercept                 | -0.170  | 0.019 | <.001 | -0.208 - -0.132 |
| Pre-meal depression       | 0.231   | 0.015 | <.001 | 0.201 - 0.261   |
| Between subject LOC       | 0.158   | 0.015 | <.001 | 0.130 - 0.187   |
| Within subject LOC        | 0.045   | 0.018 | .015  | 0.009 - 0.081   |
| Guilt                     | $\beta$ | SE    | p     | 95% CI          |
| Intercept                 | -0.092  | 0.015 | <.001 | -0.122 - -0.062 |

|                     |       |       |       |               |
|---------------------|-------|-------|-------|---------------|
| Pre-meal guilt      | 0.149 | 0.012 | <.001 | 0.125 - 0.173 |
| Between subject LOC | 0.240 | 0.016 | <.001 | 0.208 - 0.272 |
| Within subject LOC  | 0.056 | 0.020 | .005  | 0.017 - 0.095 |

---

Note: LOC, loss-of-control eating; NA, negative affect.

**Supplemental Table 3. Models Examining if LOC-Eating Severity Predicts Lagged Post-Meal NA**

| Composite negative affect | $\beta$ | SE    | p     | 95% CI          |
|---------------------------|---------|-------|-------|-----------------|
| Intercept                 | -0.243  | 0.025 | <.001 | -0.293 - -0.194 |
| Pre-meal negative affect  | 0.314   | 0.020 | <.001 | 0.274 - 0.354   |
| Between subject LOC       | 0.177   | 0.019 | <.001 | 0.140 - 0.213   |
| Within subject LOC        | 0.011   | 0.026 | .670  | -0.04 - 0.062   |
| Anger                     | $\beta$ | SE    | p     | 95% CI          |
| Intercept                 | -0.264  | 0.024 | <.001 | -0.311 - -0.216 |
| Pre-meal anger            | 0.333   | 0.019 | <.001 | 0.296 - 0.370   |
| Between subject LOC       | 0.107   | 0.019 | <.001 | 0.070 - 0.144   |
| Within subject LOC        | 0.002   | 0.033 | .962  | -0.063 - 0.066  |
| Anxiety                   | $\beta$ | SE    | p     | 95% CI          |
| Intercept                 | -0.125  | 0.022 | <.001 | -0.168 - -0.081 |
| Pre-meal anxiety          | 0.221   | 0.015 | <.001 | 0.191 - 0.251   |
| Between subject LOC       | 0.271   | 0.025 | <.001 | 0.222 - 0.320   |
| Within subject LOC        | -0.014  | 0.024 | .572  | -0.061 - 0.034  |
| Depression                | $\beta$ | SE    | p     | 95% CI          |
| Intercept                 | -0.211  | 0.031 | <.001 | -0.271 - -0.151 |
| Pre-meal depression       | 0.278   | 0.025 | <.001 | 0.229 - 0.326   |
| Between subject LOC       | 0.166   | 0.022 | <.001 | 0.123 - 0.209   |
| Within subject LOC        | 0.017   | 0.032 | .598  | -0.046 - 0.080  |
| Guilt                     | $\beta$ | SE    | p     | 95% CI          |

|                     |        |       |       |                 |
|---------------------|--------|-------|-------|-----------------|
| Intercept           | -0.080 | 0.022 | <.001 | -0.124 - -0.036 |
| Pre-meal guilt      | 0.155  | 0.018 | <.001 | 0.121 - 0.190   |
| Between subject LOC | 0.284  | 0.020 | <.001 | 0.245 - 0.323   |
| Within subject LOC  | 0.073  | 0.028 | .009  | 0.018 - 0.127   |

---

Note: LOC, loss-of-control eating; NA, negative affect.
